# Supplementary material for: Guiding the conversation—types of regret after gender-affirming surgery and their associated etiologies
Source: PubMed Central journal article supplement — Ann Transl Med. 2021 Apr;9(7):605. doi: 10.21037/atm-20-6204 (PMC8105823; doi:10.21037/atm-20-6204), 2021-04
Supplement: atm-09-07-605-supplementary.pdf [file atm-09-07-605-supplementary.pdf]

**Table S1** Results of the survey study of international gender surgeons

| Questions                                                                                                                                                                                                                                                                 | N  | %     | Median (range)          |
|---------------------------------------------------------------------------------------------------------------------------------------------------------------------------------------------------------------------------------------------------------------------------|----|-------|-------------------------|
| <b>1. How long have you been practicing since completion of your training?</b>                                                                                                                                                                                            |    |       |                         |
| <5 years                                                                                                                                                                                                                                                                  | 4  | 8.89  |                         |
| 5–10 years                                                                                                                                                                                                                                                                | 11 | 24.44 |                         |
| >10 years                                                                                                                                                                                                                                                                 | 30 | 66.67 |                         |
| <b>2. In what region of the world do you practice?</b>                                                                                                                                                                                                                    |    |       |                         |
| United States                                                                                                                                                                                                                                                             | 31 | 68.89 |                         |
| Canada                                                                                                                                                                                                                                                                    | 2  | 4.44  |                         |
| Europe                                                                                                                                                                                                                                                                    | 10 | 22.22 |                         |
| Asia                                                                                                                                                                                                                                                                      | 1  | 2.22  |                         |
| Central America                                                                                                                                                                                                                                                           | 0  | 0.00  |                         |
| South America                                                                                                                                                                                                                                                             | 1  | 2.22  |                         |
| Africa                                                                                                                                                                                                                                                                    | 0  | 0.00  |                         |
| <b>3. Approximately how many transgender patients have you surgically treated with a gender-affirming surgery in your practice (excluding facial feminization or masculinization)?</b>                                                                                    |    |       |                         |
| Less than 25                                                                                                                                                                                                                                                              | 7  | 15.22 |                         |
| 25–50                                                                                                                                                                                                                                                                     | 3  | 6.52  |                         |
| 50–100                                                                                                                                                                                                                                                                    | 3  | 6.52  | 494.02 (12.00–2,000.00) |
| 100–200                                                                                                                                                                                                                                                                   | 11 | 23.91 |                         |
| 200–500                                                                                                                                                                                                                                                                   | 9  | 19.57 |                         |
| 500–1,000                                                                                                                                                                                                                                                                 | 5  | 10.87 |                         |
| 1,000–1,500                                                                                                                                                                                                                                                               | 2  | 4.35  |                         |
| 1,500–2,000                                                                                                                                                                                                                                                               | 3  | 6.52  |                         |
| Greater than 2,000                                                                                                                                                                                                                                                        | 3  | 6.52  |                         |
| <b>4. Do you require two independent mental health evaluations prior to genital surgery?</b>                                                                                                                                                                              |    |       |                         |
| Yes                                                                                                                                                                                                                                                                       | 34 | 75.56 |                         |
| No                                                                                                                                                                                                                                                                        | 7  | 15.56 |                         |
| I do not perform genital surgery                                                                                                                                                                                                                                          | 4  | 8.89  |                         |
| <b>5. Do you require one mental health evaluation prior to chest/breast surgery?</b>                                                                                                                                                                                      |    |       |                         |
| Yes                                                                                                                                                                                                                                                                       | 28 | 62.22 |                         |
| No                                                                                                                                                                                                                                                                        | 6  | 13.33 |                         |
| I do not perform chest/breast surgery                                                                                                                                                                                                                                     | 11 | 24.44 |                         |
| <b>6. Have you ever encountered a patient who regretted their gender transition (including patients operated on elsewhere)? If yes, please specify how many. If your answer is no, please skip to question 15</b>                                                         |    |       |                         |
| I have not encountered a patient who regretted their gender transition                                                                                                                                                                                                    | 18 | 42.86 |                         |
| 1                                                                                                                                                                                                                                                                         | 12 | 28.57 |                         |
| 2                                                                                                                                                                                                                                                                         | 6  | 14.29 |                         |
| 3                                                                                                                                                                                                                                                                         | 1  | 2.38  |                         |
| 4                                                                                                                                                                                                                                                                         | 3  | 7.14  |                         |
| 5                                                                                                                                                                                                                                                                         | 0  | 0.00  |                         |
| 5–10                                                                                                                                                                                                                                                                      | 1  | 2.38  |                         |
| 10–20                                                                                                                                                                                                                                                                     | 1  | 2.38  |                         |
| >20                                                                                                                                                                                                                                                                       | 0  | 0.00  |                         |
| Total                                                                                                                                                                                                                                                                     | 62 | 100.0 |                         |
| <b>7. Of those patients who experienced regret, how many were trans-male, trans-female, and non-binary?</b>                                                                                                                                                               |    |       |                         |
| Trans-male                                                                                                                                                                                                                                                                | 19 | 30.65 |                         |
| Trans-female                                                                                                                                                                                                                                                              | 37 | 59.68 |                         |
| Non-binary/other                                                                                                                                                                                                                                                          | 6  | 9.68  |                         |
| Total identified patients                                                                                                                                                                                                                                                 | 62 | 100.0 |                         |
| <b>8. Of those patients who expressed regret, how many have there been in each category of surgery below?</b>                                                                                                                                                             |    |       |                         |
| Chest surgery                                                                                                                                                                                                                                                             | 13 | 22.41 |                         |
| Bottom surgery                                                                                                                                                                                                                                                            | 45 | 77.59 |                         |
| <b>9. In trans-female patients who sought detransition, did they experience any major complications with their initial gender affirming procedures (excluding facial feminization)? If yes, please specify what the complications were. If no, please select N/A</b>      |    |       |                         |
| Vaginal stenosis                                                                                                                                                                                                                                                          | 7  | 58.33 |                         |
| Recto-vaginal fistula                                                                                                                                                                                                                                                     | 2  | 16.67 |                         |
| Other complications                                                                                                                                                                                                                                                       |    |       |                         |
| Pain                                                                                                                                                                                                                                                                      | 2  | 16.67 |                         |
| Neuroma                                                                                                                                                                                                                                                                   | 1  | 8.33  |                         |
| Total number of complications in trans-females                                                                                                                                                                                                                            | 12 | 32.43 |                         |
| <b>10. In trans-male patients who sought detransition, did they experience any major complications with their initial gender affirming procedures (excluding facial masculinization)? If yes, please specify what the complications were. If no, please select N/A</b>    |    |       |                         |
| Flap failure                                                                                                                                                                                                                                                              | 0  | 0     |                         |
| Urethral fistula                                                                                                                                                                                                                                                          | 2  | 66.66 |                         |
| Urethral stricture                                                                                                                                                                                                                                                        | 1  | 33.33 |                         |
| Total number of complications in trans-males                                                                                                                                                                                                                              | 3  | 15.79 |                         |
| <b>11. To your knowledge, did patients seeking detransition undergo pre-operative mental health assessment prior to their initial surgery (not including facial feminization or masculinization)? Please specify how many did, how many did not, and how many unknown</b> |    |       |                         |
| Number of patients who did have pre-operative mental health assessment                                                                                                                                                                                                    | 56 | 78.87 |                         |
| Number of patients who did not have pre-operative mental health assessment                                                                                                                                                                                                | 4  | 5.63  |                         |
| Number of patients whose pre-operative mental health assessment is unknown                                                                                                                                                                                                | 11 | 15.49 |                         |
| <b>12. If you have experienced patients with regret, how many have you performed a detransitioning procedure on?</b>                                                                                                                                                      |    |       |                         |
| 0                                                                                                                                                                                                                                                                         | 18 | 50    |                         |
| 1                                                                                                                                                                                                                                                                         | 5  | 13.89 |                         |
| 2                                                                                                                                                                                                                                                                         | 1  | 2.78  |                         |
| 3                                                                                                                                                                                                                                                                         | 0  | 0     |                         |
| 4                                                                                                                                                                                                                                                                         | 0  | 0     |                         |
| 5                                                                                                                                                                                                                                                                         | 0  | 0     |                         |
| 6                                                                                                                                                                                                                                                                         | 0  | 0     |                         |
| 7                                                                                                                                                                                                                                                                         | 1  | 2.78  |                         |
| 8                                                                                                                                                                                                                                                                         | 0  | 0     |                         |
| 9                                                                                                                                                                                                                                                                         | 1  | 2.78  |                         |
| 10                                                                                                                                                                                                                                                                        | 0  | 0     |                         |
| Greater than 10                                                                                                                                                                                                                                                           | 1  | 2.78  |                         |
| Total number of patients                                                                                                                                                                                                                                                  | 36 | 100.0 |                         |
| <b>13. If you have performed a detransition procedure, please specify how many of the following you have performed</b>                                                                                                                                                    |    |       |                         |
| Reversal of mastectomy                                                                                                                                                                                                                                                    | 0  | 0     |                         |
| Reversal of breast augmentation                                                                                                                                                                                                                                           | 6  | 26.09 |                         |
| Reversal of phalloplasty                                                                                                                                                                                                                                                  | 16 | 69.56 |                         |
| Reversal of vaginoplasty                                                                                                                                                                                                                                                  | 1  | 43.34 |                         |
| Total                                                                                                                                                                                                                                                                     | 23 | 100.0 |                         |
| <b>14. Of the patients you've met who detransitioned, what were the reasons they cited for their detransition? Please specify how many for each of the reasons below. If a patient had more than reason, please select each reason</b>                                    |    |       |                         |
| Change in gender identity                                                                                                                                                                                                                                                 | 22 | 39.3  |                         |
| Fear for safety due to societal judgment                                                                                                                                                                                                                                  | 1  | 1.79  |                         |
| Concern for health                                                                                                                                                                                                                                                        | 1  | 1.79  |                         |
| Problems associated with employment or professional life                                                                                                                                                                                                                  | 1  | 1.79  |                         |
| Difficulty in marriage or romantic/sexual relationships                                                                                                                                                                                                                   | 7  | 12.50 |                         |
| Rejection or alienation from family, emotional, or social supports                                                                                                                                                                                                        | 9  | 16.07 |                         |
| Spiritual or religious conflict or pressure                                                                                                                                                                                                                               | 5  | 8.93  |                         |
| Other (please specify)                                                                                                                                                                                                                                                    |    |       |                         |
| Complications due to surgery                                                                                                                                                                                                                                              | 1  | 1.79  |                         |
| Change in sexual response                                                                                                                                                                                                                                                 | 1  | 1.79  |                         |
| Misdiagnosis                                                                                                                                                                                                                                                              | 4  | 7.14  |                         |
| Missed their natal genitals                                                                                                                                                                                                                                               | 1  | 1.79  |                         |
| Desired pregnancy                                                                                                                                                                                                                                                         | 1  | 1.79  |                         |
| Unknown                                                                                                                                                                                                                                                                   | 3  | 5.36  |                         |
| Total                                                                                                                                                                                                                                                                     | 56 | 100.0 |                         |
| <b>15. What are, or what would be, your requirements for surgical detransition? Please check all that apply</b>                                                                                                                                                           |    |       |                         |
| Mental health evaluation                                                                                                                                                                                                                                                  | 41 | 91.11 |                         |
| A certain amount of time spent in regret                                                                                                                                                                                                                                  | 31 | 68.89 |                         |
| Consideration of reasons cited for detransition                                                                                                                                                                                                                           | 37 | 82.22 |                         |
| Feasibility of obtaining desired outcome                                                                                                                                                                                                                                  | 33 | 73.33 |                         |
| Other (please specify)                                                                                                                                                                                                                                                    | 5  | 11.11 |                         |
| Three letters of recommendation                                                                                                                                                                                                                                           | 1  | 2.22  |                         |
| A specialized therapist                                                                                                                                                                                                                                                   | 1  | 2.22  |                         |
| Expectation of outcome                                                                                                                                                                                                                                                    | 1  | 2.22  |                         |
| Total number of respondents for this question                                                                                                                                                                                                                             | 45 | 100.0 |                         |
| <b>16. Do you think WPATH SOC 8 should include a chapter on detransitioning?</b>                                                                                                                                                                                          |    |       |                         |
| Yes                                                                                                                                                                                                                                                                       | 38 | 88.37 |                         |
| No                                                                                                                                                                                                                                                                        | 5  | 11.63 |                         |
